# Supplementary material
Source: ML conference proceedings conference paper supplement (https://openaccess.thecvf.com/content/ICCV2023/html/Bekuzarov_XMem_Production-level_Video_ICCV_2023_paper.html)
Supplement: Supplementary file 1 [file Bekuzarov_XMem_Production-level_Video_ICCV_2023_supplemental.zip]

Archive with 2 entries (2 files):
- 12179-supp.pdf
- 12179-supp.mp4
